# Supplementary material for: The relationship between non-motor symptoms in Parkinson’s Disease and Probable Sarcopenia
Source: Research Square preprint supplement (doi:10.21203/rs.3.rs-6290068/v1), 2025-04-22
Supplement: Supplementary file 1 [file e2f929126ffc927224fa33a6.docx]

**Table 1. Sociodemographic and clinical characteristics of the participants**

|  | Control (n=43) | Parkinson’s disease (n=50) | p |
| --- | --- | --- | --- |
| Age, median (min-max) | 73 (65-90) | 73 (65-82) | 0.252 |
| Gender  Female, n(%)  Male, n(%) | 23 (53.5)  20 (46.5) | 18 (36)  32 (64) | 0.090 |
| Smoking  No, n(%)  Yes, n(%) | 33 (76.7)  10 (23.3) | 48 (96)  2 (4) | **0.006** |
| Alcohol consumption  No, n(%)  Yes, n(%) | 40 (93)  3 (7) | 50 (100)  0 (0) | 0.095 |
| Polypharmacy  No, n(%)  Yes, n(%) | 19 (46.3)  22 (53.7) | 25 (50)  25 (50) | 0.728 |
| Hypertension, n(%) | 31 (72.1) | 28 (56) | 0.108 |
| Diabetes Mellitus, n(%) | 13 (30.2) | 9 (18) | 0.166 |
| Fall  No, n(%)  Yes, n(%) | 34 (79.1)  9 (20.9) | 22 (44)  28 (56) | **0.001** |
| BMI ± SD | 26.4 ± 5.7 | 27.4 ± 4.9 | 0.384 |
| Calf circumference, median (min-max) | 35 (21-46) | 36 (29-45) | 0.066 |
| Basic ADL, median (min-max) | 5 (2-6) | 5 (0-6) | **0.049** |
| Instrumental ADL, median (min-max) | 8 (2-8) | 8 (0-8) | **0.006** |
| Mini mental state examination score, median (min-max) | 28 (18-30) | 27 (11-30) | **0.005** |
| Mini nutritional examination short form, median (min-max) | 13 (4-14) | 12 (6-14) | 0.258 |
| Clinical frailty scale category, median (min-max) | 3 (0-6) | 4 (1-6) | **0.004** |
| SARC-F, median (min-max) | 1 (0-5) | 3 (0-8) | **<0.001** |
| Hand Grip Strength ± SD | 19.2 ± 6.8 | 21.8 ± 7.1 | 0.081 |
| Skeletel muscle mass index (SMMI), median (min-max) | 10.16 (7.76-12.70) | 11.05 (4.64-14.06) | **0.014** |
| Geriatric Depression Scale Short Form, median (min-max) | 2 (0-12) | 3 (0-13) | 0.059 |
| Probable sarcopenia  No, n(%)  Yes, n(%) | 16 (37.2)  27 (62.8) | 20 (40)  30 (60) | 0.783 |

Data expressed in percentage (%), as well as mean ± standart deviation for normally distributed and median (min-max) for not normally distributed. BMI, body mass index; ADL, activities of daily living;

**Table 2. Patients characteristics and relation with probable sarcopenia in patients with PD**

|  | Probable Sarcopenia | |  |
| --- | --- | --- | --- |
|  | No (n=20) | Yes (n=30) | p |
| Age, median (min-max) | 71 (65-81) | 74 (65-82) | 0.089 |
| Gender  Female, n(%)  Male, n(%) | 9 (45)  11 (55) | 9 (30)  21 (70) | 0.279 |
| Type of the disease  Tremor dominant type  Non-tremor dominant type | 14 (70)  6 (30) | 15 (50)  15 (50) | 0.160 |
| Duration of illness, median (min-max) | 5 (1-13) | 5 (1-14) | 0.359 |
| Polypharmacy  No, n(%)  Yes, n(%) | 11 (55)  9 (45) | 14 (46.7)  16 (53.3) | 0.564 |
| Fall  No, n(%)  Yes, n(%) | 12 (60)  8 (40) | 9 (30)  21 (70) | **0.035** |
| Calf circumference, median (min-max) | 36.5 (30-42) | 36 (29-45) | 0.712 |
| L-dopa, median (min-max) | 600 (200-1200) | 770 (200-1831) | 0.259 |
| Basic ADL, median (min-max) | 6 (5-6) | 4 (1-6) | **0.001** |
| Instrumental ADL, median (min-max) | 8 (7-8) | 6 (0-8) | **<0.001** |
| Mini mental state examination score, median (min-max) | 28 (20-30) | 27 (11-29) | 0.105 |
| Mini nutritional assessment short form, median (min-max) | 13 (10-14) | 11 (6-14) | **0.002** |
| Geriatric Depression Scale Short Form, median (min-max) | 3 (0-7) | 4 (0-13) | 0.181 |
| Hand Grip Strength ± SD | 26.3 ± 5.8 | 18.8 ± 6.3 | **<0.001** |
| Skeletel muscle mass index (SMMI), median (min-max) | 11.08 (8.63-13.29) | 11.05 (4.64-14.06) | 0.953 |
| Non motor score | 8.2 ± 4.1 | 11.8 ± 3.8 | **0.003** |
| Non motor DERECE  Derece 1  Derece 2  Derece 3  Derece 4 | 5 (25)  8 (40)  5 (25)  2 (10) | 1 (3.3)  7 (23.3)  12 (40)  10 (33.3) | **0.025** |
| UPDRS, median (min-max) | 30 (9-78) | 58 (15-98) | **0.003** |
| UPDRS I | 2 (0-7) | 5 (1-9) | **0.005** |
| UPDRS II | 9 (2-28) | 20 (3-39) | **0.003** |
| UPDRS III | 16 (4-38) | 25 (9-41) | **0.003** |
| UPDRS IV | 2 (0-11) | 4 (0-18) | 0.117 |
| Hoen-Yahr , median (min-max) | 2 (1-4) | 3 (2-4) | **0.009** |
| Dysphagia  No, n(%)  Yes, n(%) | 18 (90)  2 (10) | 19 (63.3)  11 (36.7) | **0.035** |
| Orthostatic hypotension  No, n(%)  Yes, n(%) | 15 (75)  5 (25) | 14 (46.7)  16 (53.3) | **0.047** |
| Hiposmi  No, n(%)  Yes, n(%) | 12 (60)  8 (40) | 14 (46.7)  16 (53.3) | 0.355 |
| Tinetti FES, median (min-max) | 34 (11-92) | 72 (8-97) | **0.031** |
| 4 m walking time, median (min-max) | 4.8 (2.84-7) | 6 (3.35-14.21) | **0.038** |
| Timed up and go test , median (min-max) | 11.65 (8-17.30) | 14.08 (9.30-29) | **0.008** |
| Five times sit to stand test ± SD | 13.4 ± 3.2 | 16.3 ± 4.7 | **0.041** |
| Clinical frailty scale category, median (min-max) | 4 (1-5) | 5 (3-6) | **0.003** |
| SARC-F, median (min-max) | 2 (0-7) | 4 (1-8) | **0.001** |

**Table 3. Univariable and multivariable logistic regression analysis of factors associated with probable sarcopenia in patients with PD**

|  | Unadjusted | | Adjusted | |
| --- | --- | --- | --- | --- |
| Risk Factors | OR (95% CI) | p | OR (95% CI) | p |
| Non motor puan | 1.26 (1.06-1.48) | **0.007** |  |  |
| Orthostatic hypotension | 3.43 (0.99-11.85) | 0.052 | 32.11 (1.53-676.05) | **0.026** |
| SARC-F | 1.32 (1.07-1.64) | **0.011** | 2.92 (1.09-7.82) | **0.033** |
| Age | 1.1 (1.01-1.19) | **0.027** |  |  |
| UPDRS score | 1.05 (1.01-1.08) | **0.006** | 0.88 (0.79-0.98) | **0.019** |
| Dysphagia | 5.21 (1.01-26.83) | **0.048** |  |  |
| 4 m walking time | 1.41 (1.05-1.9) | **0.021** |  |  |
| Clinical frailty scale category | 1.9 (1.24-2.9) | **0.003** | 7.86 (1.07-57.52) | **0.042** |
| Mini nutritional assessment short form | 0.8 (0.66-0.96) | **1.019** | 0.55 (0.28-1.07) | 0.079 |

OR:odds ratio, CI:confidence interval

The p value of the Hosmere-Lemeshow test was 0.560, the following factors were entered into the multivariable logistic regression analysis: Age, NMS score , Orthostatic hypotension, SARF-C, UPDRS score, Dysphagia, 4 m walking time, Clinical frailty scale category, Mini nutritional assessment short form
